# Supplementary material for: Graphitic carbon quantum dots as a fluorescent sensing platform for highly efficient detection of Fe3+ ions
Source: Royal Society of Chemistry journal article supplement (doi:10.1039/c3ra23410j), 2013-01-01
Supplement: c3ra23410j.pdf [file c3ra23410j.pdf]

## Electronic Supplementary Information (ESI) for

# Graphitic carbon quantum dots as a fluorescent sensing platform for highly efficient detection of Fe<sup>3+</sup> ions†

Yong-Lai Zhang,<sup>a,c</sup> Lei Wang,<sup>c</sup> Heng-Chao Zhang,<sup>b</sup> Yang Liu,<sup>b</sup> Hai-Yu Wang,<sup>c</sup> Zhen-Hui Kang<sup>\*b</sup> and Shuit-Tong Lee<sup>\*a</sup>

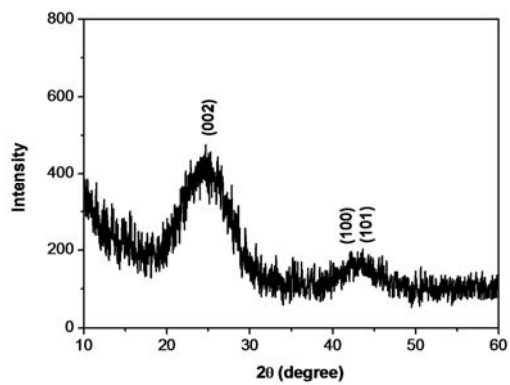

Fig. S1 XRD pattern of the GCQDs.

---

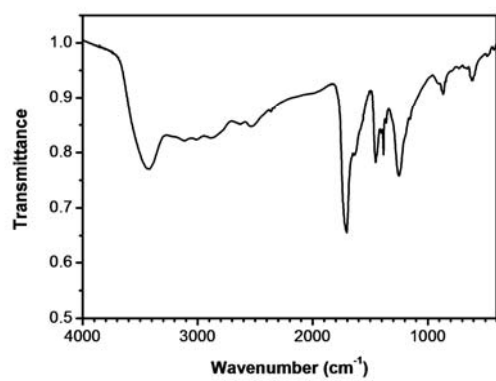

5 Fig. S2 FT-IR spectrum of GCQDs.

---

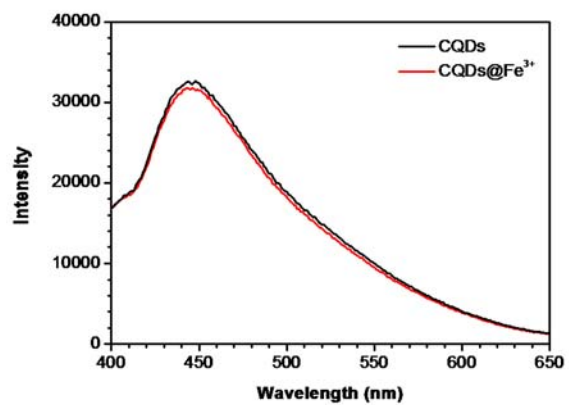

Fig. S3 PL spectra of CQDs prepared by microwave treatment of glucose in the absence and presence of Fe<sup>3+</sup> (1  $\mu$ M)

---
